# Supplementary material for: Monitoring of induced distributed double-couple sources using Marchenko-based virtual receivers
Source: Copernicus journal article supplement (doi:10.5194/se-10-1301-2019), 2019-08-05
Supplement: Supplementary file 1 [file se-10-1301-2019-supplement.pdf]

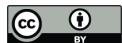

*Supplement of*

## **Monitoring of induced distributed double-couple sources using Marchenko-based virtual receivers**

**Joeri Brackenhoff et al.**

*Correspondence to:* Joeri Brackenhoff ([j.a.brackenhoff@tudelft.nl](mailto:j.a.brackenhoff@tudelft.nl))

The copyright of individual parts of the supplement might differ from the CC BY 4.0 License.

## S1 Classical homogeneous Green's function representation

### S1.1 Definition of the homogeneous Green's function

Consider an inhomogeneous lossless acoustic medium with mass density  $\rho(\mathbf{x})$  and compressibility  $\kappa(\mathbf{x})$ . In this medium a space- and time-dependent source distribution  $q(\mathbf{x}, t)$  is present, with  $q$  defined as the volume-injection rate density. The acoustic wave field, caused by this source distribution, is described in terms of the acoustic pressure  $p(\mathbf{x}, t)$  and the particle velocity  $v_i(\mathbf{x}, t)$ . These field quantities obey the equation of motion and the stress-strain relation, according to

$$\rho \partial_t v_i + \partial_i p = 0, \quad (\text{S1})$$

$$\kappa \partial_t p + \partial_i v_i = q. \quad (\text{S2})$$

When  $q$  is an impulsive source at  $\mathbf{x} = \mathbf{x}_A$  and  $t = 0$ , according to

$$q(\mathbf{x}, t) = \delta(\mathbf{x} - \mathbf{x}_A) \delta(t), \quad (\text{S3})$$

then the causal solution of Eqs. (S1) and (S2) defines the Green's function, hence

$$p(\mathbf{x}, t) = G(\mathbf{x}, \mathbf{x}_A, t). \quad (\text{S4})$$

By eliminating  $v_i$  from Eqs. (S1) and (S2) and substituting Eqs. (S3) and (S4), we find that the Green's function  $G(\mathbf{x}, \mathbf{x}_A, t)$  obeys the following wave equation

$$\partial_i (\rho^{-1} \partial_i G) - \kappa \partial_t^2 G = -\delta(\mathbf{x} - \mathbf{x}_A) \partial_t \delta(t). \quad (\text{S5})$$

Wave equation (S5) is symmetric in time, except for the source on the right-hand side, which is anti-symmetric. Hence, the time-reversed Green's function  $G(\mathbf{x}, \mathbf{x}_A, -t)$  obeys the same wave equation, but with opposite sign for the source. By summing the wave equations for  $G(\mathbf{x}, \mathbf{x}_A, t)$  and  $G(\mathbf{x}, \mathbf{x}_A, -t)$ , the sources on the right-hand sides cancel each other, hence, the homogeneous Green's function

$$G_h(\mathbf{x}, \mathbf{x}_A, t) = G(\mathbf{x}, \mathbf{x}_A, t) + G(\mathbf{x}, \mathbf{x}_A, -t) \quad (\text{S6})$$

obeys the homogeneous equation

$$\partial_i (\rho^{-1} \partial_i G_h) - \kappa \partial_t^2 G_h = 0. \quad (\text{S7})$$

### S1.2 Reciprocity theorems

We define the temporal Fourier transform of a time-dependent quantity  $u(t)$  as

$$u(\omega) = \int_{-\infty}^{\infty} u(t) \exp(i\omega t) dt. \quad (\text{S8})$$

In the frequency domain, Eqs. (S1) and (S2) transform to

$$-i\omega \rho v_i + \partial_i p = 0, \quad (\text{S9})$$

$$-i\omega \kappa p + \partial_i v_i = q. \quad (\text{S10})$$

We introduce two independent acoustic states, which will be distinguished by subscripts A and B. Rayleigh's reciprocity theorem is obtained by considering the quantity  $\partial_i \{p_A v_{i,B} - v_{i,A} p_B\}$ , applying the product rule for differentiation, substituting Eqs. (S9) and (S10) for both states, integrating the result over a spatial domain  $\mathbb{V}$  enclosed by surface  $\mathbb{S}$  with outward pointing

normal  $n_i$ , and applying the theorem of Gauss (de Hoop, 1988; Fokkema and van den Berg, 1993). Assuming that in  $\mathbb{V}$  the medium parameters  $\rho(\mathbf{x})$  and  $\kappa(\mathbf{x})$  in the two states are identical, this yields Rayleigh's reciprocity theorem of the convolution type

$$\int_{\mathbb{V}} \{p_A q_B - q_A p_B\} d\mathbf{x} = \oint_{\mathbb{S}} \frac{1}{i\omega\rho} \{p_A(\partial_i p_B) - (\partial_i p_A)p_B\} n_i d\mathbf{x}. \quad (\text{S11})$$

We derive a second form of Rayleigh's reciprocity theorem for time-reversed wave fields. In the frequency domain, time-reversal is replaced by complex conjugation. When  $p$  is a solution of Eqs. (S9) and (S10) with source distribution  $q$  (and real-valued medium parameters), then  $p^*$  obeys the same equations with source distribution  $-q^*$ . Making these substitutions for state A in Eq. (S11) we obtain Rayleigh's reciprocity theorem of the correlation type (Bojarski, 1983)

$$\int_{\mathbb{V}} \{p_A^* q_B + q_A^* p_B\} d\mathbf{x} = \oint_{\mathbb{S}} \frac{1}{i\omega\rho} \{p_A^*(\partial_i p_B) - (\partial_i p_A^*)p_B\} n_i d\mathbf{x}. \quad (\text{S12})$$

### S1.3 Representation of the homogeneous Green's function

We choose point sources in both states, according to  $q_A(\mathbf{x}, \omega) = \delta(\mathbf{x} - \mathbf{x}_A)$  and  $q_B(\mathbf{x}, \omega) = \delta(\mathbf{x} - \mathbf{x}_B)$ , with  $\mathbf{x}_A$  and  $\mathbf{x}_B$  both in  $\mathbb{V}$ . The fields in states A and B are thus expressed in terms of Green's functions, according to

$$p_A(\mathbf{x}, \omega) = G(\mathbf{x}, \mathbf{x}_A, \omega), \quad (\text{S13})$$

$$p_B(\mathbf{x}, \omega) = G(\mathbf{x}, \mathbf{x}_B, \omega), \quad (\text{S14})$$

with  $G(\mathbf{x}, \mathbf{x}_A, \omega)$  and  $G(\mathbf{x}, \mathbf{x}_B, \omega)$  being the Fourier transforms of  $G(\mathbf{x}, \mathbf{x}_A, t)$  and  $G(\mathbf{x}, \mathbf{x}_B, t)$ , respectively. Making these substitutions in Eq. (S12) and using source-receiver reciprocity of the Green's functions gives (Porter, 1970; Oristaglio, 1989; Wapenaar, 2004; Van Manen et al., 2005)

$$G_h(\mathbf{x}_B, \mathbf{x}_A, \omega) = \oint_{\mathbb{S}} \frac{1}{i\omega\rho(\mathbf{x})} \left( \{\partial_i G(\mathbf{x}, \mathbf{x}_B, \omega)\} G^*(\mathbf{x}, \mathbf{x}_A, \omega) - G(\mathbf{x}, \mathbf{x}_B, \omega) \partial_i G^*(\mathbf{x}, \mathbf{x}_A, \omega) \right) n_i d\mathbf{x}, \quad (\text{S15})$$

where  $G_h(\mathbf{x}_B, \mathbf{x}_A, \omega)$  is the homogeneous Green's function in the frequency domain. It is defined as

$$G_h(\mathbf{x}, \mathbf{x}_A, \omega) = G(\mathbf{x}, \mathbf{x}_A, \omega) + G^*(\mathbf{x}, \mathbf{x}_A, \omega) = 2\Re\{G(\mathbf{x}, \mathbf{x}_A, \omega)\}, \quad (\text{S16})$$

where  $\Re$  denotes the real part. Equation (S15) is an exact representation for the homogeneous Green's function  $G_h(\mathbf{x}_B, \mathbf{x}_A, \omega)$ .

When  $\mathbb{S}$  is sufficiently smooth and the medium outside  $\mathbb{S}$  is homogeneous (with mass density  $\rho_0$ , compressibility  $\kappa_0$  and propagation velocity  $c_0 = (\kappa_0\rho_0)^{-1/2}$ ), the two terms under the integral in Eq. (S15) are nearly identical (but opposite in sign), hence

$$G_h(\mathbf{x}_B, \mathbf{x}_A, \omega) = -2 \oint_{\mathbb{S}} \frac{1}{i\omega\rho_0} G(\mathbf{x}, \mathbf{x}_B, \omega) \partial_i G^*(\mathbf{x}, \mathbf{x}_A, \omega) n_i d\mathbf{x}. \quad (\text{S17})$$

The main approximation is that evanescent waves are neglected at  $\mathbb{S}$  (Zheng et al., 2011; Wapenaar et al., 2011).

## S2 Single-sided homogeneous Green's function representations

### S2.1 Modification of the configuration

We replace the arbitrary closed surface  $\mathbb{S}$  by a combination of two surfaces  $\mathbb{S}_0$  and  $\mathbb{S}_A$ , as indicated in Fig. S1. Here  $\mathbb{S}_0$  may be curved, but  $\mathbb{S}_A$  is a horizontal surface, with  $\mathbf{n} = (0, 0, 1)$ . The depth level of  $\mathbb{S}_A$  is defined as  $x_{3,A}$  (which is equal to

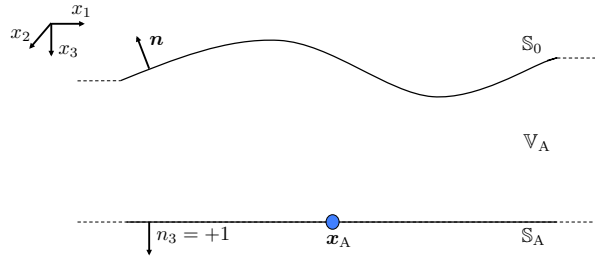

**Figure S1.** Modified configuration. The surface  $\mathbb{S}$  consists of the combination of surfaces  $\mathbb{S}_0$  and  $\mathbb{S}_A$ .

the  $x_3$ -coordinate of the point  $\mathbf{x}_A$ ). The domain between surfaces  $\mathbb{S}_0$  and  $\mathbb{S}_A$  is called  $\mathbb{V}_A$ . For this configuration, reciprocity theorems (S11) and (S12) are replaced by

$$\int_{\mathbb{V}_A} \{p_A q_B - q_A p_B\} d\mathbf{x} = \int_{\mathbb{S}_0} \frac{1}{i\omega\rho} \{p_A (\partial_i p_B) - (\partial_i p_A) p_B\} n_i d\mathbf{x} + \int_{\mathbb{S}_A} \frac{1}{i\omega\rho} \{p_A (\partial_3 p_B) - (\partial_3 p_A) p_B\} d\mathbf{x} \quad (\text{S18})$$

and

$$\int_{\mathbb{V}_A} \{p_A^* q_B + q_A^* p_B\} d\mathbf{x} = \int_{\mathbb{S}_0} \frac{1}{i\omega\rho} \{p_A^* (\partial_i p_B) - (\partial_i p_A^*) p_B\} n_i d\mathbf{x} + \int_{\mathbb{S}_A} \frac{1}{i\omega\rho} \{p_A^* (\partial_3 p_B) - (\partial_3 p_A^*) p_B\} d\mathbf{x}, \quad (\text{S19})$$

respectively. In the following we use these reciprocity theorems as the basis for deriving several versions of single-sided homogeneous Green's function representations, each time by applying decomposition to one or more of the integrals in these theorems.

## S2.2 Single-sided homogeneous Green's function representation: general formulation

Following a similar derivation as in Appendix B in Wapenaar and Berkhout (1989), we reformulate Eqs. (S18) and (S19) as

$$\int_{\mathbb{V}_A} (p_A q_B - q_A p_B) d\mathbf{x} = \int_{\mathbb{S}_0} \frac{1}{i\omega\rho} (p_A (\partial_i p_B) - (\partial_i p_A) p_B) n_i d\mathbf{x} - \int_{\mathbb{S}_A} \frac{2}{i\omega\rho} ((\partial_3 p_A^+) p_B^- + (\partial_3 p_A^-) p_B^+) d\mathbf{x} \quad (\text{S20})$$

and, ignoring evanescent waves,

$$\int_{\mathbb{V}_A} (p_A^* q_B + q_A^* p_B) d\mathbf{x} = \int_{\mathbb{S}_0} \frac{1}{i\omega\rho} (p_A^* (\partial_i p_B) - (\partial_i p_A^*) p_B) n_i d\mathbf{x} - \int_{\mathbb{S}_A} \frac{2}{i\omega\rho} ((\partial_3 p_A^+)^* p_B^+ + (\partial_3 p_A^-)^* p_B^-) d\mathbf{x}. \quad (\text{S21})$$

The superscripts  $+$  and  $-$  stand for downgoing and upgoing, respectively. For state A we consider the focusing function  $f_1(\mathbf{x}, \mathbf{x}_A, \omega) = f_1^+(\mathbf{x}, \mathbf{x}_A, \omega) + f_1^-(\mathbf{x}, \mathbf{x}_A, \omega)$ , introduced in section 3.1 in the companion paper ‘‘Green's theorem in seismic imaging across the scales’’ (Wapenaar et al., 2019). This focusing function is defined in a truncated version of the medium, which is identical to the actual medium in  $\mathbb{V}_A$ , but reflection free above  $\mathbb{S}_0$  and below  $\mathbb{S}_A$ . The focusing conditions at the focal plane  $\mathbb{S}_A$  are (Wapenaar et al., 2014)

$$[\partial_3 f_1^+(\mathbf{x}, \mathbf{x}_A, \omega)]_{x_3=x_{3,A}} = \frac{1}{2} i\omega\rho(\mathbf{x}_A) \delta(\mathbf{x}_H - \mathbf{x}_{H,A}), \quad (\text{S22})$$

$$[\partial_3 f_1^-(\mathbf{x}, \mathbf{x}_A, \omega)]_{x_3=x_{3,A}} = 0. \quad (\text{S23})$$

For state B we consider the Green's function  $G(\mathbf{x}, \mathbf{x}_B, \omega) = G^+(\mathbf{x}, \mathbf{x}_B, \omega) + G^-(\mathbf{x}, \mathbf{x}_B, \omega)$ , with its source at  $\mathbf{x}_B$  anywhere in the half-space below  $\mathbb{S}_0$ . Note that the superscripts  $+$  and  $-$  in  $f_1^\pm(\mathbf{x}, \mathbf{x}_A, \omega)$  and  $G^\pm(\mathbf{x}, \mathbf{x}_B, \omega)$  refer to the propagation

direction (downward or upward) at the observation point  $\mathbf{x}$ . The source of the Green's function at  $\mathbf{x}_B$  is omnidirectional. Substituting  $q_A(\mathbf{x}, \omega) = 0$ ,  $p_A^\pm(\mathbf{x}, \omega) = f_1^\pm(\mathbf{x}, \mathbf{x}_A, \omega)$ ,  $q_B(\mathbf{x}, \omega) = \delta(\mathbf{x} - \mathbf{x}_B)$  and  $p_B^\pm(\mathbf{x}, \omega) = G^\pm(\mathbf{x}, \mathbf{x}_B, \omega)$  into Eqs. (S20) and (S21), using Eqs. (S22) and (S23), gives

$$\begin{aligned} & G^-(\mathbf{x}_A, \mathbf{x}_B, \omega) + \chi(\mathbf{x}_B) f_1(\mathbf{x}_B, \mathbf{x}_A, \omega) \\ &= \int_{\mathbb{S}_0} \frac{1}{i\omega\rho(\mathbf{x})} \left( \{ \partial_i G(\mathbf{x}, \mathbf{x}_B, \omega) \} f_1(\mathbf{x}, \mathbf{x}_A, \omega) - G(\mathbf{x}, \mathbf{x}_B, \omega) \partial_i f_1(\mathbf{x}, \mathbf{x}_A, \omega) \right) n_i d\mathbf{x} \end{aligned} \quad (\text{S24})$$

and

$$\begin{aligned} & G^+(\mathbf{x}_A, \mathbf{x}_B, \omega) - \chi(\mathbf{x}_B) f_1^*(\mathbf{x}_B, \mathbf{x}_A, \omega) \\ &= - \int_{\mathbb{S}_0} \frac{1}{i\omega\rho(\mathbf{x})} \left( \{ \partial_i G(\mathbf{x}, \mathbf{x}_B, \omega) \} f_1^*(\mathbf{x}, \mathbf{x}_A, \omega) - G(\mathbf{x}, \mathbf{x}_B, \omega) \partial_i f_1^*(\mathbf{x}, \mathbf{x}_A, \omega) \right) n_i d\mathbf{x}, \end{aligned} \quad (\text{S25})$$

respectively, where  $\chi$  is the characteristic function of the domain  $\mathbb{V}_A$ . It is defined as

$$\chi(\mathbf{x}_B) = \begin{cases} 1, & \text{for } \mathbf{x}_B \text{ between } \mathbb{S}_0 \text{ and } \mathbb{S}_A, \\ \frac{1}{2}, & \text{for } \mathbf{x}_B \text{ on } \mathbb{S} = \mathbb{S}_0 \cup \mathbb{S}_A, \\ 0, & \text{for } \mathbf{x}_B \text{ outside } \mathbb{S}. \end{cases} \quad (\text{S26})$$

Summing Eqs. (S24) and (S25) and using source-receiver reciprocity for the Green's function on the left-hand side yields

$$\begin{aligned} & G(\mathbf{x}_B, \mathbf{x}_A, \omega) + \chi(\mathbf{x}_B) 2i\Im\{f_1(\mathbf{x}_B, \mathbf{x}_A, \omega)\} \\ &= \int_{\mathbb{S}_0} \frac{2}{\omega\rho(\mathbf{x})} \left( \{ \partial_i G(\mathbf{x}, \mathbf{x}_B, \omega) \} \Im\{f_1(\mathbf{x}, \mathbf{x}_A, \omega)\} - G(\mathbf{x}, \mathbf{x}_B, \omega) \Im\{\partial_i f_1(\mathbf{x}, \mathbf{x}_A, \omega)\} \right) n_i d\mathbf{x}, \end{aligned} \quad (\text{S27})$$

where  $\Im$  denotes the imaginary part. Taking the real part of both sides of this equation, using Eq. (S16), gives the single-sided representation of the homogeneous Green's function

$$G_h(\mathbf{x}_B, \mathbf{x}_A, \omega) = \int_{\mathbb{S}_0} \frac{2}{\omega\rho(\mathbf{x})} \left( \{ \partial_i G_h(\mathbf{x}, \mathbf{x}_B, \omega) \} \Im\{f_1(\mathbf{x}, \mathbf{x}_A, \omega)\} - G_h(\mathbf{x}, \mathbf{x}_B, \omega) \Im\{\partial_i f_1(\mathbf{x}, \mathbf{x}_A, \omega)\} \right) n_i d\mathbf{x}. \quad (\text{S28})$$

### S2.3 Single-sided homogeneous Green's function representation: assuming a homogeneous upper half-space

From here onward we assume that also  $\mathbb{S}_0$  is a horizontal surface, with  $\mathbf{n} = (0, 0, -1)$ . Following a similar derivation as in Appendix B in Wapenaar and Berkhout (1989), we reformulate Eqs. (S18) and (S19) as

$$\begin{aligned} & \int_{\mathbb{V}_A} (p_A^+ q_B^- + p_A^- q_B^+ - q_A^+ p_B^- - q_A^- p_B^+) d\mathbf{x} = \\ & \int_{\mathbb{S}_0} \frac{2}{i\omega\rho} \left( (\partial_3 p_A^+) p_B^- + (\partial_3 p_A^-) p_B^+ \right) d\mathbf{x} - \int_{\mathbb{S}_A} \frac{2}{i\omega\rho} \left( (\partial_3 p_A^+) p_B^- + (\partial_3 p_A^-) p_B^+ \right) d\mathbf{x} \end{aligned} \quad (\text{S29})$$

and, ignoring evanescent waves,

$$\begin{aligned} & \int_{\mathbb{V}_A} (p_A^{+*} q_B^+ + p_A^{-*} q_B^- + q_A^{+*} p_B^+ + q_A^{-*} p_B^-) d\mathbf{x} = \\ & \int_{\mathbb{S}_0} \frac{2}{i\omega\rho} \left( (\partial_3 p_A^+)^* p_B^+ + (\partial_3 p_A^-)^* p_B^- \right) d\mathbf{x} - \int_{\mathbb{S}_A} \frac{2}{i\omega\rho} \left( (\partial_3 p_A^+)^* p_B^+ + (\partial_3 p_A^-)^* p_B^- \right) d\mathbf{x}. \end{aligned} \quad (\text{S30})$$

We apply these theorems to the situation in which the upper half-space above  $\mathbb{S}_0$  is homogeneous (for the Green's function as well as for the focusing function). For state A we consider again the focusing function  $f_1(\mathbf{x}, \mathbf{x}_A, \omega) = f_1^+(\mathbf{x}, \mathbf{x}_A, \omega) + f_1^-(\mathbf{x}, \mathbf{x}_A, \omega)$ , defined in a truncated version of the medium. For state B we consider the Green's function  $G(\mathbf{x}, \mathbf{x}_B, \omega) = G^{+,+}(\mathbf{x}, \mathbf{x}_B, \omega) + G^{-,+}(\mathbf{x}, \mathbf{x}_B, \omega) + G^{+,-}(\mathbf{x}, \mathbf{x}_B, \omega) + G^{-,-}(\mathbf{x}, \mathbf{x}_B, \omega)$ , with its source at  $\mathbf{x}_B$  anywhere in the half-space below  $\mathbb{S}_0$ . Note that we introduced two superscripts. The first superscript refers again to the propagation direction at the observation point  $\mathbf{x}$ . The second superscript refers to the radiation direction of the source at  $\mathbf{x}_B$ . Substituting  $q_A^+(\mathbf{x}, \omega) = q_A^-(\mathbf{x}, \omega) = 0$ ,  $p_A^\pm(\mathbf{x}, \omega) = f_1^\pm(\mathbf{x}, \mathbf{x}_A, \omega)$ ,  $q_B^+(\mathbf{x}, \omega) = \delta(\mathbf{x} - \mathbf{x}_B)$ ,  $q_B^-(\mathbf{x}, \omega) = 0$  and  $p_B^\pm(\mathbf{x}, \omega) = G^{\pm,+}(\mathbf{x}, \mathbf{x}_B, \omega)$  into Eqs. (S29) and (S30), using Eqs. (S22) and (S23) and  $G^{+,+}(\mathbf{x}, \mathbf{x}_B, \omega) = 0$  for  $\mathbf{x}$  at  $\mathbb{S}_0$  (since the upper half-space is homogeneous), gives

$$G^{-,+}(\mathbf{x}_A, \mathbf{x}_B, \omega) + \chi(\mathbf{x}_B) f_1^-(\mathbf{x}_B, \mathbf{x}_A, \omega) = \int_{\mathbb{S}_0} \frac{2}{i\omega\rho_0} G^{-,+}(\mathbf{x}, \mathbf{x}_B, \omega) \partial_3 f_1^+(\mathbf{x}, \mathbf{x}_A, \omega) d\mathbf{x} \quad (\text{S31})$$

and

$$G^{+,+}(\mathbf{x}_A, \mathbf{x}_B, \omega) - \chi(\mathbf{x}_B) \{f_1^+(\mathbf{x}_B, \mathbf{x}_A, \omega)\}^* = - \int_{\mathbb{S}_0} \frac{2}{i\omega\rho_0} G^{-,+}(\mathbf{x}, \mathbf{x}_B, \omega) \{\partial_3 f_1^-(\mathbf{x}, \mathbf{x}_A, \omega)\}^* d\mathbf{x}. \quad (\text{S32})$$

Next, substituting  $q_A^+(\mathbf{x}, \omega) = q_A^-(\mathbf{x}, \omega) = 0$ ,  $p_A^\pm(\mathbf{x}, \omega) = f_1^\pm(\mathbf{x}, \mathbf{x}_A, \omega)$ ,  $q_B^+(\mathbf{x}, \omega) = 0$ ,  $q_B^-(\mathbf{x}, \omega) = \delta(\mathbf{x} - \mathbf{x}_B)$  and  $p_B^\pm(\mathbf{x}, \omega) = G^{\pm,-}(\mathbf{x}, \mathbf{x}_B, \omega)$  into Eqs. (S29) and (S30), using Eqs. (S22) and (S23) and  $G^{+,-}(\mathbf{x}, \mathbf{x}_B, \omega) = 0$  for  $\mathbf{x}$  at  $\mathbb{S}_0$ , gives

$$G^{-,-}(\mathbf{x}_A, \mathbf{x}_B, \omega) + \chi(\mathbf{x}_B) f_1^+(\mathbf{x}_B, \mathbf{x}_A, \omega) = \int_{\mathbb{S}_0} \frac{2}{i\omega\rho_0} G^{-,-}(\mathbf{x}, \mathbf{x}_B, \omega) \partial_3 f_1^+(\mathbf{x}, \mathbf{x}_A, \omega) d\mathbf{x} \quad (\text{S33})$$

and

$$G^{+,-}(\mathbf{x}_A, \mathbf{x}_B, \omega) - \chi(\mathbf{x}_B) \{f_1^-(\mathbf{x}_B, \mathbf{x}_A, \omega)\}^* = - \int_{\mathbb{S}_0} \frac{2}{i\omega\rho_0} G^{-,-}(\mathbf{x}, \mathbf{x}_B, \omega) \{\partial_3 f_1^-(\mathbf{x}, \mathbf{x}_A, \omega)\}^* d\mathbf{x}. \quad (\text{S34})$$

Summing Eqs. (S31) – (S34), using source-receiver reciprocity for the Green's function on the left-hand side and  $G^{+,+}(\mathbf{x}, \mathbf{x}_B, \omega) = G^{+,-}(\mathbf{x}, \mathbf{x}_B, \omega) = 0$  for  $\mathbf{x}$  at  $\mathbb{S}_0$ , we obtain

$$G(\mathbf{x}_B, \mathbf{x}_A, \omega) + \chi(\mathbf{x}_B) 2i\Im\{f_1(\mathbf{x}_B, \mathbf{x}_A, \omega)\} = \int_{\mathbb{S}_0} \frac{2}{i\omega\rho_0} G(\mathbf{x}, \mathbf{x}_B, \omega) \partial_3 (f_1^+(\mathbf{x}, \mathbf{x}_A, \omega) - \{f_1^-(\mathbf{x}, \mathbf{x}_A, \omega)\}^*) d\mathbf{x}. \quad (\text{S35})$$

Taking the real part of both sides gives the single-sided representation of the homogeneous Green's function for the situation that the upper half-space is homogeneous

$$G_h(\mathbf{x}_B, \mathbf{x}_A, \omega) = 4\Re \int_{\mathbb{S}_0} \frac{1}{i\omega\rho_0} G(\mathbf{x}, \mathbf{x}_B, \omega) \partial_3 (f_1^+(\mathbf{x}, \mathbf{x}_A, \omega) - \{f_1^-(\mathbf{x}, \mathbf{x}_A, \omega)\}^*) d\mathbf{x}. \quad (\text{S36})$$

We conclude by deriving source-receiver reciprocity relations for the decomposed Green's functions  $G^{\pm,\pm}(\mathbf{x}, \mathbf{x}_B, \omega)$ . We consider Eq. (S29), but replace  $\mathbb{V}_A$  by the entire space  $\mathbb{R}^3$ . In this situation there are only outgoing waves at  $\mathbb{S}$ . Hence, Eq. (S29) simplifies to

$$\int_{\mathbb{R}^3} (p_A^+ q_B^- + p_A^- q_B^+ - q_A^+ p_B^- - q_A^- p_B^+) d\mathbf{x} = 0. \quad (\text{S37})$$

First we substitute  $q_A^+ = \delta(\mathbf{x} - \mathbf{x}_A)$ ,  $q_A^- = 0$ ,  $p_A^\pm = G^{\pm,+}(\mathbf{x}, \mathbf{x}_A, \omega)$ ,  $q_B^+ = \delta(\mathbf{x} - \mathbf{x}_B)$ ,  $q_B^- = 0$  and  $p_B^\pm = G^{\pm,+}(\mathbf{x}, \mathbf{x}_B, \omega)$ . This gives

$$G^{-,+}(\mathbf{x}_B, \mathbf{x}_A, \omega) = G^{-,+}(\mathbf{x}_A, \mathbf{x}_B, \omega). \quad (\text{S38})$$

Next, we substitute  $q_A^+ = \delta(\mathbf{x} - \mathbf{x}_A)$ ,  $q_A^- = 0$ ,  $p_A^\pm = G^{\pm,+}(\mathbf{x}, \mathbf{x}_A, \omega)$ ,  $q_B^+ = 0$ ,  $q_B^- = \delta(\mathbf{x} - \mathbf{x}_B)$  and  $p_B^\pm = G^{\pm,-}(\mathbf{x}, \mathbf{x}_B, \omega)$ . This gives

$$G^{+,+}(\mathbf{x}_B, \mathbf{x}_A, \omega) = G^{-,-}(\mathbf{x}_A, \mathbf{x}_B, \omega). \quad (\text{S39})$$

Finally, we substitute  $q_A^+ = 0$ ,  $q_A^- = \delta(\mathbf{x} - \mathbf{x}_A)$ ,  $p_A^\pm = G^{\pm,-}(\mathbf{x}, \mathbf{x}_A, \omega)$ ,  $q_B^+ = 0$ ,  $q_B^- = \delta(\mathbf{x} - \mathbf{x}_B)$  and  $p_B^\pm = G^{\pm,-}(\mathbf{x}, \mathbf{x}_B, \omega)$ . This gives

$$G^{+,-}(\mathbf{x}_B, \mathbf{x}_A, \omega) = G^{+,-}(\mathbf{x}_A, \mathbf{x}_B, \omega). \quad (\text{S40})$$

Note that Eq. (S39) does not include a minus sign, unlike the corresponding relation for the flux-normalised decomposed Green's functions (Wapenaar, 1996). As a result of this definition, we have the following simple expression for the full Green's function

$$G(\mathbf{x}, \mathbf{x}_A, \omega) = G^{+,+}(\mathbf{x}, \mathbf{x}_A, \omega) + G^{-,+}(\mathbf{x}, \mathbf{x}_A, \omega) + G^{+,-}(\mathbf{x}, \mathbf{x}_A, \omega) + G^{-,-}(\mathbf{x}, \mathbf{x}_A, \omega). \quad (\text{S41})$$

## References

- Bojarski, N. N.: Generalized reaction principles and reciprocity theorems for the wave equations, and the relationship between the time-advanced and time-retarded fields, *J. Acoust. Soc. Am.*, 74, 281–285, 1983.
- de Hoop, A. T.: Time-domain reciprocity theorems for acoustic wave fields in fluids with relaxation, *J. Acoust. Soc. Am.*, 84, 1877–1882, 1988.
- Fokkema, J. T. and van den Berg, P. M.: *Seismic applications of acoustic reciprocity*, Elsevier, Amsterdam, 1993.
- Oristaglio, M. L.: An inverse scattering formula that uses all the data, *Inverse Probl.*, 5, 1097–1105, 1989.
- Porter, R. P.: Diffraction-limited, scalar image formation with holograms of arbitrary shape, *J. Opt. Soc. Am.*, 60, 1051–1059, 1970.
- Van Manen, D.-J., Robertsson, J. O. A., and Curtis, A.: Modeling of wave propagation in inhomogeneous media, *Phys. Rev. Lett.*, 94, 164301, <https://doi.org/10.1103/PhysRevLett.94.164301>, 2005.
- Wapenaar, C. P. A.: One-way representations of seismic data, *Geophys. J. Int.*, 127, 178–188, 1996.
- Wapenaar, C. P. A. and Berkhout, A. J.: *Elastic wave field extrapolation*, Elsevier, Amsterdam, 1989.
- Wapenaar, K.: Retrieving the elastodynamic Green’s function of an arbitrary inhomogeneous medium by cross correlation, *Phys. Rev. Lett.*, 93, 254301, <https://doi.org/10.1103/PhysRevLett.93.254301>, 2004.
- Wapenaar, K., van der Neut, J., Ruigrok, E., Draganov, D., Hunziker, J., Slob, E., Thorbecke, J., and Snieder, R.: Seismic interferometry by crosscorrelation and by multidimensional deconvolution: a systematic comparison, *Geophys. J. Int.*, 185, 1335–1364, 2011.
- Wapenaar, K., Thorbecke, J., van der Neut, J., Brogini, F., Slob, E., and Snieder, R.: Marchenko imaging, *Geophysics*, 79, WA39–WA57, 2014.
- Wapenaar, K., Brackenhoff, J., and Thorbecke, J.: Green’s theorem in seismic imaging across the scales, *Solid Earth*, 10, 517–536, 2019.
- Zheng, Y., He, Y., and Fehler, M. C.: Crosscorrelation kernels in acoustic Green’s function retrieval by wavefield correlation for point sources on a plane and a sphere, *Geophys. J. Int.*, 184, 853–859, 2011.
